# Supplementary material
Source: HighWire-hosted journal article supplement (https://jnnp.bmj.com/content/92/11/1231)
Supplement: inline-supplementary-material-1 [file inline-supplementary-material-1.pdf]

Association between blood A $\beta$  and brain A $\beta$  burden (A $\beta$  status determined by PET A $\beta$ )

| Technology type                                             | Biomarkers measured                                                                                                                                                                                                                                                                                          | Cohort details                                                                                                                                                                                                                                                                                                         | Change in A $\beta$ + group vs A $\beta$ - group                                                                                                                                                                                                                                                                                                                                                                                                                                                                    | Accuracy to identify increased amyloid pathology (AUC for A $\beta$ + vs A $\beta$ -)                                                                                                                                                                                                                                                                                                                                                                                                                                                                                                                                                                                                                                                                                                                                                                                                                                                                                                                                                                                                                                                                                                                                                                                                                                                                                   | Correlation with <i>in vivo</i> amyloid pathology                                                                                                                                                                                                                                                                                                                                                                                                                                                                                                                                                                                                                                                                                                                                                                                                                                                                                                                                                                                                                                                                                                           |
|-------------------------------------------------------------|--------------------------------------------------------------------------------------------------------------------------------------------------------------------------------------------------------------------------------------------------------------------------------------------------------------|------------------------------------------------------------------------------------------------------------------------------------------------------------------------------------------------------------------------------------------------------------------------------------------------------------------------|---------------------------------------------------------------------------------------------------------------------------------------------------------------------------------------------------------------------------------------------------------------------------------------------------------------------------------------------------------------------------------------------------------------------------------------------------------------------------------------------------------------------|-------------------------------------------------------------------------------------------------------------------------------------------------------------------------------------------------------------------------------------------------------------------------------------------------------------------------------------------------------------------------------------------------------------------------------------------------------------------------------------------------------------------------------------------------------------------------------------------------------------------------------------------------------------------------------------------------------------------------------------------------------------------------------------------------------------------------------------------------------------------------------------------------------------------------------------------------------------------------------------------------------------------------------------------------------------------------------------------------------------------------------------------------------------------------------------------------------------------------------------------------------------------------------------------------------------------------------------------------------------------------|-------------------------------------------------------------------------------------------------------------------------------------------------------------------------------------------------------------------------------------------------------------------------------------------------------------------------------------------------------------------------------------------------------------------------------------------------------------------------------------------------------------------------------------------------------------------------------------------------------------------------------------------------------------------------------------------------------------------------------------------------------------------------------------------------------------------------------------------------------------------------------------------------------------------------------------------------------------------------------------------------------------------------------------------------------------------------------------------------------------------------------------------------------------|
| <b>IP-MS (MALDI-TOF/MS)</b><br>(Kaneko et al., 2014)        | Plasma A $\beta$ 40, A $\beta$ 42 and APP669–711 (A $\beta$ -3–40)                                                                                                                                                                                                                                           | 62 participants:<br>22 A $\beta$ - and 40 A $\beta$ +                                                                                                                                                                                                                                                                  | <ul style="list-style-type: none"> <li>Plasma A<math>\beta</math>42: ↓ in A<math>\beta</math>+ group</li> <li>Plasma A<math>\beta</math>42/A<math>\beta</math>40 ratio: ↓ in A<math>\beta</math>+ group</li> <li>Plasma APP669–711/A<math>\beta</math>42 ratio: ↑ in A<math>\beta</math>+ group</li> </ul>                                                                                                                                                                                                          | <ul style="list-style-type: none"> <li>Plasma A<math>\beta</math>42: 0.808</li> <li>Plasma A<math>\beta</math>42/A<math>\beta</math>40 ratio: 0.798</li> <li>Plasma APP669–711/A<math>\beta</math>42 ratio: 0.969</li> </ul>                                                                                                                                                                                                                                                                                                                                                                                                                                                                                                                                                                                                                                                                                                                                                                                                                                                                                                                                                                                                                                                                                                                                            | SUVR and <ul style="list-style-type: none"> <li>Plasma A<math>\beta</math>42: r= <b>-0.374</b></li> <li>Plasma A<math>\beta</math>42/A<math>\beta</math>40 ratio: r= <b>-0.316</b></li> <li>Plasma APP669-711/A<math>\beta</math>42 ratio: r= <b>0.687</b></li> </ul>                                                                                                                                                                                                                                                                                                                                                                                                                                                                                                                                                                                                                                                                                                                                                                                                                                                                                       |
| <b>IP-MS (LC-MS/MS)</b><br>(Ovod et al., 2017)              | Plasma A $\beta$ 38, A $\beta$ 40 and A $\beta$ 42                                                                                                                                                                                                                                                           | 41 participants:<br>23 A $\beta$ - and 18 A $\beta$ +                                                                                                                                                                                                                                                                  | Plasma A $\beta$ 42/A $\beta$ 40 ratio: ↓ in A $\beta$ + group                                                                                                                                                                                                                                                                                                                                                                                                                                                      | Plasma A $\beta$ 42/A $\beta$ 40 ratio: 0.887                                                                                                                                                                                                                                                                                                                                                                                                                                                                                                                                                                                                                                                                                                                                                                                                                                                                                                                                                                                                                                                                                                                                                                                                                                                                                                                           |                                                                                                                                                                                                                                                                                                                                                                                                                                                                                                                                                                                                                                                                                                                                                                                                                                                                                                                                                                                                                                                                                                                                                             |
| <b>IP-MS (MALDI-TOF/MS)</b><br>(Nakamura et al., 2018)      | Plasma A $\beta$ 40, A $\beta$ 42 and APP669–711 (A $\beta$ -3–40)<br><br><b>Composite biomarker:</b> average of the normalized values of APP669-711/Ab42 ratio and A $\beta$ 40/A $\beta$ 42 ratio                                                                                                          | <ul style="list-style-type: none"> <li>Cohort 1 (NCGG, n=121): 71 A<math>\beta</math>- and 50 A<math>\beta</math>+</li> <li>Cohort 2 (AIBL, n= 252): 115 A<math>\beta</math>- and 137 A<math>\beta</math>+</li> <li>PIB (n=111: 51 A<math>\beta</math>- and 60 A<math>\beta</math>+) and FLUTE/ FBP (n=141)</li> </ul> | Both NCGG and AIBL: <ul style="list-style-type: none"> <li>Plasma A<math>\beta</math>42: ↓ in A<math>\beta</math>+ group</li> <li>Plasma A<math>\beta</math>40/A<math>\beta</math>42 ratio: ↑ in A<math>\beta</math>+ group</li> <li>Plasma APP669-711/A<math>\beta</math>42 ratio: ↑ in A<math>\beta</math>+ group</li> <li>Plasma Composite biomarker: ↑ in A<math>\beta</math>+ group</li> </ul>                                                                                                                 | <ul style="list-style-type: none"> <li>Plasma A<math>\beta</math>42: <ul style="list-style-type: none"> <li>NCGG: 0.872 (0.913)<sup>#</sup></li> <li>AIBL PIB: 0.757 (0.812)<sup>#</sup></li> <li>AIBL Overall: 0.718 (0.797)<sup>#</sup></li> <li>NCGG + AIBL (PiB): 0.835</li> <li>NCGG + AIBL (overall): 0.789</li> </ul> </li> <li>Plasma A<math>\beta</math>40/A<math>\beta</math>42 ratio: <ul style="list-style-type: none"> <li>NCGG: 0.967 (0.979)<sup>#</sup></li> <li>AIBL PIB: 0.889 (0.897)<sup>#</sup></li> <li>AIBL Overall: 0.837 (0.851)<sup>#</sup></li> <li>NCGG + AIBL (PiB): 0.935</li> <li>NCGG + AIBL (overall): 0.886</li> </ul> </li> <li>Plasma APP669-711/A<math>\beta</math>42 ratio: <ul style="list-style-type: none"> <li>NCGG: 0.923 (0.933)<sup>#</sup></li> <li>AIBL PIB: 0.895 (0.905)<sup>#</sup></li> <li>AIBL Overall: 0.828 (0.854)<sup>#</sup></li> <li>NCGG + AIBL (PiB): 0.907</li> <li>NCGG + AIBL (overall): 0.861</li> </ul> </li> <li>Plasma Composite biomarker: <ul style="list-style-type: none"> <li>NCGG: 0.967 (0.974)<sup>#</sup></li> <li>AIBL PIB: 0.941 (0.940)<sup>#</sup></li> <li>AIBL Overall: 0.883 (0.888)<sup>#</sup></li> <li>NCGG + AIBL (PiB): 0.954</li> <li>NCGG + AIBL (overall): 0.914</li> </ul> </li> </ul> <p><sup>#</sup>AUC after adjustment for age, gender, APOE and clinical category</p> | <ul style="list-style-type: none"> <li>SUVR and plasma A<math>\beta</math>42 in: <ul style="list-style-type: none"> <li>NCGG: r= <b>-0.601</b></li> <li>AIBL PIB: r= <b>-0.423</b></li> <li>NCGG + AIBL PiB: r= <b>-0.529</b></li> <li>Overall (NCGG + AIBL overall): r= <b>0.484</b></li> </ul> </li> <li>SUVR and plasma A<math>\beta</math>40/A<math>\beta</math>42 ratio in: <ul style="list-style-type: none"> <li>NCGG: r= <b>0.767</b></li> <li>AIBL PIB: r= <b>0.601</b></li> <li>NCGG + AIBL PiB: r= <b>0.694</b></li> <li>Overall (NCGG + AIBL overall): r= <b>0.626</b></li> </ul> </li> <li>SUVR and plasma APP669-711/ A<math>\beta</math>42 ratio in: <ul style="list-style-type: none"> <li>NCGG: r= <b>0.715</b></li> <li>AIBL PIB: r= <b>0.612</b></li> <li>NCGG + AIBL PiB: r= <b>0.670</b></li> <li>Overall (NCGG + AIBL overall): r= <b>0.606</b></li> </ul> </li> <li>SUVR and plasma composite biomarker in: <ul style="list-style-type: none"> <li>NCGG: r= <b>0.785</b></li> <li>AIBL PIB: r= <b>0.684</b></li> <li>NCGG + AIBL PiB: r= <b>0.735</b></li> <li>Overall (NCGG + AIBL overall): r= <b>0.678</b></li> </ul> </li> </ul> |
| <b>IP-MS (LC-MS/MS)</b><br>(Schindler et al., 2019)         | Plasma A $\beta$ 38, A $\beta$ 40 and A $\beta$ 42                                                                                                                                                                                                                                                           | 158 participants:<br><ul style="list-style-type: none"> <li>115 A<math>\beta</math>-, 43 A<math>\beta</math>+</li> <li>PIB (n=117: 88 A<math>\beta</math>- and 29 A<math>\beta</math>), AV45 (Florbetapir; n=41: 27 A<math>\beta</math>- and 14 A<math>\beta</math>+) )</li> </ul>                                     | Plasma A $\beta$ 42/A $\beta$ 40 ratio: ↓ in A $\beta$ + group                                                                                                                                                                                                                                                                                                                                                                                                                                                      | <ul style="list-style-type: none"> <li>Plasma A<math>\beta</math>42/A<math>\beta</math>40 ratio: 0.88</li> <li>Plasma A<math>\beta</math>42/A<math>\beta</math>40 ratio, age and APOE: 0.94</li> </ul>                                                                                                                                                                                                                                                                                                                                                                                                                                                                                                                                                                                                                                                                                                                                                                                                                                                                                                                                                                                                                                                                                                                                                                  | <ul style="list-style-type: none"> <li>PET centiloid and plasma A<math>\beta</math>42/A<math>\beta</math>40 ratio: r= -0.55 (p-value not reported; 95% CI= -0.65 to -0.43)</li> </ul>                                                                                                                                                                                                                                                                                                                                                                                                                                                                                                                                                                                                                                                                                                                                                                                                                                                                                                                                                                       |
| <b>IP-MS (LC-MS/MS) vs Simoa</b><br>(Keshavan et al., 2021) | LC-MS: Plasma A $\beta$ 38, A $\beta$ 40, A $\beta$ 42, APP669–711 (A $\beta$ -3–40), Composite biomarker (average of the z-scores of APP669-711/A $\beta$ 42 ratio and A $\beta$ 40/Ab42 ratio)<br><br>Simoa: Plasma A $\beta$ 40 and A $\beta$ 42 (also measured p-tau181; refer to supplementary Table 2) | 441 participants:<br><ul style="list-style-type: none"> <li>359 A<math>\beta</math>-, 82 A<math>\beta</math>+</li> <li>Florbetapir PET</li> </ul>                                                                                                                                                                      | LC-MS: <ul style="list-style-type: none"> <li>Plasma A<math>\beta</math>42: ↓ in A<math>\beta</math>+ group</li> <li>Plasma A<math>\beta</math>42/A<math>\beta</math>40: ↓ in A<math>\beta</math>+ group</li> <li>Plasma Composite biomarker: ↑ in A<math>\beta</math>+ group</li> </ul> <p>Simoa:</p> <ul style="list-style-type: none"> <li>Plasma A<math>\beta</math>42: ↓ in A<math>\beta</math>+ group</li> <li>Plasma A<math>\beta</math>42/A<math>\beta</math>40: ↓ in A<math>\beta</math>+ group</li> </ul> | <ul style="list-style-type: none"> <li>All subjects (410 CU, 7 MCI, 24 prior neurological condition):</li> <li>LC-MS: <ul style="list-style-type: none"> <li>Plasma A<math>\beta</math>42: 0.736 (0.789)<sup>#</sup></li> <li>Plasma A<math>\beta</math>42/A<math>\beta</math>40: 0.817 (0.841)<sup>#</sup></li> <li>Plasma Composite biomarker: 0.820 (0.843)<sup>#</sup></li> </ul> </li> <li>Simoa: <ul style="list-style-type: none"> <li>Plasma A<math>\beta</math>42: 0.590 (0.705)<sup>#</sup></li> <li>Plasma A<math>\beta</math>42/A<math>\beta</math>40: 0.620 (0.727)<sup>#</sup></li> </ul> </li> </ul>                                                                                                                                                                                                                                                                                                                                                                                                                                                                                                                                                                                                                                                                                                                                                     |                                                                                                                                                                                                                                                                                                                                                                                                                                                                                                                                                                                                                                                                                                                                                                                                                                                                                                                                                                                                                                                                                                                                                             |

|                                                   |                                                                                                                                                        |                                                                                                                                                                                                |                                                                                                                                                                                                                                                                                                                         |                                                                                                                                                                                                                                                                                                                                                                                                                                                                                                                                                                                                                                                                                                                            |                                                                                                                                                                                                                                                                                                                                                                                                                                                                                                                                                                                                       |
|---------------------------------------------------|--------------------------------------------------------------------------------------------------------------------------------------------------------|------------------------------------------------------------------------------------------------------------------------------------------------------------------------------------------------|-------------------------------------------------------------------------------------------------------------------------------------------------------------------------------------------------------------------------------------------------------------------------------------------------------------------------|----------------------------------------------------------------------------------------------------------------------------------------------------------------------------------------------------------------------------------------------------------------------------------------------------------------------------------------------------------------------------------------------------------------------------------------------------------------------------------------------------------------------------------------------------------------------------------------------------------------------------------------------------------------------------------------------------------------------------|-------------------------------------------------------------------------------------------------------------------------------------------------------------------------------------------------------------------------------------------------------------------------------------------------------------------------------------------------------------------------------------------------------------------------------------------------------------------------------------------------------------------------------------------------------------------------------------------------------|
|                                                   |                                                                                                                                                        |                                                                                                                                                                                                |                                                                                                                                                                                                                                                                                                                         | <p>➢ Plasma Aβ42/Aβ40 and p-tau181: 0.696 (0.776)<sup>#</sup></p> <p>LC-MS and Simoa:<br/>         ➢ LC-MS Plasma Aβ42/Aβ40 and Simoa Plasma p-tau181: 0.826 (0.851)<sup>#</sup><br/>         ➢ LC-MS Plasma composite and Simoa Plasma p-tau181: 0.829 (0.850)<sup>#</sup></p> <p>• CU (n=410) :<br/>         LC-MS:<br/>         ➢ Plasma Aβ42: 0.734 (0.785)<sup>#</sup><br/>         ➢ Plasma Aβ42/Aβ40: 0.817 (0.839)<sup>#</sup><br/>         ➢ Plasma Composite biomarker: 0.823 (0.842)<sup>#</sup></p> <p>Simoa:<br/>         ➢ Plasma Aβ42: 0.570 (0.694)<sup>#</sup><br/>         ➢ Plasma Aβ42/Aβ40: 0.610 (0.720)<sup>#</sup></p> <p><sup>#</sup> AUC after adjustment for age, gender and APOE</p>           |                                                                                                                                                                                                                                                                                                                                                                                                                                                                                                                                                                                                       |
| <b>Simoa</b><br>(Janellidze et al., 2016)         | Plasma Aβ40, Aβ42<br>Measured using "first-generation" singleplex from Quanterix                                                                       | 340 participants:<br><ul style="list-style-type: none"> <li>125 controls, 103 subjective cognitive decline (SCD), 112 MCI</li> <li>Flutemetamol PET</li> </ul>                                 |                                                                                                                                                                                                                                                                                                                         | <ul style="list-style-type: none"> <li>Plasma Aβ42, age and gender: 0.604</li> <li>Plasma Aβ42/Aβ40 ratio, age and gender: 0.621</li> </ul>                                                                                                                                                                                                                                                                                                                                                                                                                                                                                                                                                                                | <ul style="list-style-type: none"> <li>SUVR and plasma Aβ42 in:<br/>             ➢ All subjects: r= <b>-0.162</b><br/>             ➢ Controls: r= 0.005<br/>             ➢ SCD: r= -0.189<br/>             ➢ MCI: r= <b>-0.295</b></li> <li>SUVR and plasma Aβ42/Aβ40 ratio in:<br/>             ➢ All subjects: r= <b>-0.167</b><br/>             ➢ Controls: r= -0.130<br/>             ➢ SCD: r= <b>-0.205</b><br/>             ➢ MCI: r= -0.154</li> </ul>                                                                                                                                        |
| <b>Simoa</b><br>(Verberk et al., 2018)            | Plasma Aβ40, Aβ42<br>Measured using Neurology 3-plex from Quanterix                                                                                    | 69 participants:<br><ul style="list-style-type: none"> <li>23 Aβ+ and 46 Aβ-</li> <li>Florbetaben (n=33), Florbetapir (n=20), Flutemetamol (n=6), PIB (n=10)</li> </ul>                        | <ul style="list-style-type: none"> <li>Plasma Aβ42: ↓ in Aβ+ group</li> <li>Plasma Aβ42/ Aβ40 ratio: no significant difference between Aβ+ and Aβ- groups (p=0.057)</li> </ul>                                                                                                                                          | <ul style="list-style-type: none"> <li>Plasma Aβ42: 0.66</li> <li>Plasma Aβ42/Aβ40 ratio: 0.68</li> <li>Plasma Aβ42/Aβ40 ratio, age and APOE: 0.79</li> </ul>                                                                                                                                                                                                                                                                                                                                                                                                                                                                                                                                                              |                                                                                                                                                                                                                                                                                                                                                                                                                                                                                                                                                                                                       |
| <b>Simoa and ELISA</b><br>(De Meyer et al., 2020) | Plasma Aβ40, Aβ42<br>Measured using prototype Simoa Amyblood assay or ELISA (EUROIMMUN)<br><br>Plasma total-tau (t-tau) was also measured using ELISA. | 199 participants:<br><ul style="list-style-type: none"> <li>161 Aβ- and 38 Aβ+</li> <li>161 CU: 137 Aβ- and 24 Aβ+ (Flutemetamol)</li> <li>38 aMCI: 24 Aβ- and 14 Aβ+ (Florbetaben)</li> </ul> | <ul style="list-style-type: none"> <li>Plasma Aβ42/Aβ40 ratio: For both Simoa and ELISA platforms, the ratio ↓ Aβ+ groups in the total cohort, CU and aMCI subgroups</li> <li>Plasma Aβ42/t-tau ratio: For both Simoa and ELISA platforms, the ratio ↓ Aβ+ groups in the total cohort, CU and aMCI subgroups</li> </ul> | <ul style="list-style-type: none"> <li>Plasma Aβ42/Aβ40 ratio:<br/>             ➢ All: Simoa: 0.79 (0.81)<sup>#</sup> vs ELISA: 0.78 (0.78)<sup>#</sup><br/>             ➢ CU: Simoa: 0.77 (0.76)<sup>#</sup> vs ELISA: 0.79 (0.75)<sup>#</sup><br/>             ➢ aMCI: Simoa: 0.86 (0.92)<sup>#</sup> vs ELISA: 0.81 (0.84)<sup>#</sup></li> <li>Plasma Aβ42/t-tau ratio:<br/>             ➢ All: Simoa: 0.77 (0.80)<sup>#</sup> vs ELISA: 0.77 (0.79)<sup>#</sup><br/>             ➢ CU: Simoa: 0.74 (0.77)<sup>#</sup> vs ELISA: 0.74 (0.75)<sup>#</sup><br/>             ➢ aMCI: Simoa: 0.86 (0.89)<sup>#</sup> vs ELISA: 0.88 (0.88)<sup>#</sup></li> </ul> <p><sup>#</sup>AUC after adjustment for age and APOE</p> | <ul style="list-style-type: none"> <li>PET centiloid and plasma Aβ42/Aβ40 ratio:<br/>             ➢ All: Simoa: r= <b>-0.32</b> vs ELISA: r= <b>-0.32</b><br/>             ➢ CU: Simoa: r= <b>-0.26</b> vs ELISA: r= <b>-0.25</b><br/>             ➢ aMCI: Simoa: r= <b>-0.62</b> vs ELISA: r= <b>-0.68</b></li> <li>PET centiloid and plasma Aβ42/t-tau ratio:<br/>             ➢ All: Simoa: r= <b>-0.29</b> vs ELISA: r= <b>-0.36</b><br/>             ➢ CU: Simoa: r= <b>-0.24</b> vs ELISA: r= <b>-0.31</b><br/>             ➢ aMCI: Simoa: r= <b>-0.58</b> vs ELISA: r= <b>-0.59</b></li> </ul> |
| <b>Simoa</b><br>(Brickman et al. 2021)            | Plasma Aβ40, Aβ42<br>Measured using Neurology 3-plex from Quanterix                                                                                    | 300 participants:<br>Of the 300 participants, 40 participants have amyloid PET scan: 8Aβ+ and 32 Aβ-                                                                                           | <ul style="list-style-type: none"> <li>Plasma Aβ42/ Aβ40 ratio: no significant difference between Aβ+ and Aβ- groups</li> </ul>                                                                                                                                                                                         |                                                                                                                                                                                                                                                                                                                                                                                                                                                                                                                                                                                                                                                                                                                            |                                                                                                                                                                                                                                                                                                                                                                                                                                                                                                                                                                                                       |
| <b>IMR</b><br>(Tzen et al., 2014)                 | Plasma Aβ40, Aβ42                                                                                                                                      | 45 participants                                                                                                                                                                                |                                                                                                                                                                                                                                                                                                                         |                                                                                                                                                                                                                                                                                                                                                                                                                                                                                                                                                                                                                                                                                                                            | <ul style="list-style-type: none"> <li>SUVR and plasma Aβ42/Aβ40 ratio: β= <b>0.652</b> (Regression)</li> </ul>                                                                                                                                                                                                                                                                                                                                                                                                                                                                                       |
| <b>MDS</b>                                        | Plasma oligomeric Aβ                                                                                                                                   | 50 participants                                                                                                                                                                                |                                                                                                                                                                                                                                                                                                                         |                                                                                                                                                                                                                                                                                                                                                                                                                                                                                                                                                                                                                                                                                                                            | <ul style="list-style-type: none"> <li>SUVR and plasma MDS RLU: r= 0.430</li> </ul>                                                                                                                                                                                                                                                                                                                                                                                                                                                                                                                   |

|                                                                       |                                                                                                                                                                                                                                                                                               |                                                                                                                                     |                                                                                                                                                                                                                                                                                                                                  |                                                                                                                                                                                                                              |                                                                                                                                                                                                                                                                       |
|-----------------------------------------------------------------------|-----------------------------------------------------------------------------------------------------------------------------------------------------------------------------------------------------------------------------------------------------------------------------------------------|-------------------------------------------------------------------------------------------------------------------------------------|----------------------------------------------------------------------------------------------------------------------------------------------------------------------------------------------------------------------------------------------------------------------------------------------------------------------------------|------------------------------------------------------------------------------------------------------------------------------------------------------------------------------------------------------------------------------|-----------------------------------------------------------------------------------------------------------------------------------------------------------------------------------------------------------------------------------------------------------------------|
| (Wang et al., 2017)                                                   | Measured in MDS relative luminescence unit (RLU): higher MDS RLU = higher A $\beta$ oligomers                                                                                                                                                                                                 |                                                                                                                                     |                                                                                                                                                                                                                                                                                                                                  |                                                                                                                                                                                                                              | (p-value not reported)                                                                                                                                                                                                                                                |
| <b>MSD</b><br>(Vogelgsang et al., 2018)                               | Plasma A $\beta$ 38, A $\beta$ 40, A $\beta$ 42<br><br>Note: in most plasma samples, A $\beta$ 38 was below the LLOD and excluded from further analysis                                                                                                                                       | 41 participants:<br>Of the 41 participants, 20 have amyloid PET scan: 10 A $\beta$ - and 10 A $\beta$ +                             | <ul style="list-style-type: none"> <li>Plasma A<math>\beta</math>42: no significant difference between A<math>\beta</math>+ and A<math>\beta</math>- groups</li> <li>Plasma A<math>\beta</math>42/A<math>\beta</math>40 ratio: no significant difference between A<math>\beta</math>+ and A<math>\beta</math>- groups</li> </ul> |                                                                                                                                                                                                                              |                                                                                                                                                                                                                                                                       |
| <b>APEX and Simoa</b><br>(Lim et al., 2019) and (Tanaka et al., 2020) | Plasma exosome-bound A $\beta$ 42 (APEX), Simoa-measured A $\beta$ 40 and A $\beta$ 42                                                                                                                                                                                                        | 72 participants (4 subjects were excluded in the study by Tanaka et al., 2020):<br>45 A $\beta$ - and 23 A $\beta$ +                |                                                                                                                                                                                                                                                                                                                                  | <ul style="list-style-type: none"> <li>Plasma APEX-A<math>\beta</math>42: 0.995</li> <li>Plasma Simoa-A<math>\beta</math>42: 0.776</li> <li>Plasma Simoa-A<math>\beta</math>42/A<math>\beta</math>40 ratio: 0.816</li> </ul> | SUVR and <ul style="list-style-type: none"> <li>Plasma APEX-A<math>\beta</math>42: r= <b>0.949</b></li> <li>Plasma Simoa-A<math>\beta</math>42: r= <b>-0.342</b></li> <li>plasma Simoa-A<math>\beta</math>42/A<math>\beta</math>40 ratio: r= <b>-0.351</b></li> </ul> |
| <b>Interdigitated microelectrode system</b><br>(Kim et al., 2019)     | Plasma A $\beta$ in heterogenous (monomers + oligomers/ aggregates) and monomerized states<br><br>Measured in self-standard ratio, which is calculated by dividing the concentration of homogenous A $\beta$ monomers (in EPPS-treated plasma) by that of heterogenous A $\beta$ (nontreated) | <ul style="list-style-type: none"> <li>Cohort 1 (n=53):<br/>➢ Florbetaben PET</li> <li>Cohort 2 (n=53):<br/>➢ FC119S PET</li> </ul> |                                                                                                                                                                                                                                                                                                                                  |                                                                                                                                                                                                                              | SUVR and self –standard ratio in: <ul style="list-style-type: none"> <li>Cohort 1: r= <b>0.551</b></li> <li>Cohort 2: r= <b>0.414</b></li> </ul>                                                                                                                      |

Association between blood A $\beta$  and brain A $\beta$  burden (A $\beta$  status determined by CSF A $\beta$ )

| Technology type                                                   | Biomarkers measured                                                                                                                                                    | Cohort details                                                                                                                                                                                               | Change in A $\beta$ + group vs A $\beta$ - group                                                                                                                                                                                                                          | Accuracy to identify increased amyloid pathology (AUC for A $\beta$ + vs A $\beta$ -)                                                                                                                                                                                          | Correlation with <i>in vivo</i> amyloid pathology                                                                                                                                                                                                                                                                                                                                     |
|-------------------------------------------------------------------|------------------------------------------------------------------------------------------------------------------------------------------------------------------------|--------------------------------------------------------------------------------------------------------------------------------------------------------------------------------------------------------------|---------------------------------------------------------------------------------------------------------------------------------------------------------------------------------------------------------------------------------------------------------------------------|--------------------------------------------------------------------------------------------------------------------------------------------------------------------------------------------------------------------------------------------------------------------------------|---------------------------------------------------------------------------------------------------------------------------------------------------------------------------------------------------------------------------------------------------------------------------------------------------------------------------------------------------------------------------------------|
| IP-MS (MALDI-TOF/MS; confirmed by LC-MS/MS) (Pannee et al., 2014) | Plasma A $\beta$ 38, A $\beta$ 40 and A $\beta$ 42 (absolute quantification by selected reaction monitoring)                                                           | 19 participants:<br>• 9 AD and 10 controls                                                                                                                                                                   | • Plasma A $\beta$ 38, A $\beta$ 40, A $\beta$ 42 or A $\beta$ 42/40 ratio: no significant difference between AD and controls                                                                                                                                             |                                                                                                                                                                                                                                                                                | CSF A $\beta$ 42 and plasma A $\beta$ 42 in:<br>• Controls: $r = -0.067$<br>• AD: $r = -0.11$                                                                                                                                                                                                                                                                                         |
| IP-MS (LC-MS/MS) (Ovod et al., 2017)                              | Plasma A $\beta$ 38, A $\beta$ 40 and A $\beta$ 42                                                                                                                     | 41 participants:<br>• 23 A $\beta$ - and 18 A $\beta$ +<br>Note: A $\beta$ status was determined by PET when available and otherwise by CSF A $\beta$ 42 concentration                                       | • Plasma A $\beta$ 42/A $\beta$ 40 ratio: $\downarrow$ in A $\beta$ + group                                                                                                                                                                                               | • Plasma A $\beta$ 42/A $\beta$ 40 ratio: 0.887                                                                                                                                                                                                                                | • CSF A $\beta$ 42/A $\beta$ 40 ratio and plasma A $\beta$ 42/A $\beta$ 40 ratio: $r = 0.700$                                                                                                                                                                                                                                                                                         |
| IP-MS (MALDI-TOF/MS) (Nakamura et al., 2018)                      | Plasma A $\beta$ 40, A $\beta$ 42 and APP669-711<br><br>Composite biomarker values: average of the normalized values of APP669-711/Ab42 ratio and Ab40/Ab42 ratio      | In cohort 2: 46 participants                                                                                                                                                                                 |                                                                                                                                                                                                                                                                           | In this group of 46 subjects,<br>• If PET A $\beta$ was used as the standard for A $\beta$ + / A $\beta$ - status: Plasma composite biomarker: 0.838<br>• If CSF A $\beta$ 42 was used as the standard for A $\beta$ + / A $\beta$ - status: Plasma composite biomarker: 0.876 | CSF A $\beta$ 42 and<br>• Plasma A $\beta$ 42: $r = 0.408$<br>• Plasma A $\beta$ 40/A $\beta$ 42 ratio: $r = -0.534$<br>• Plasma APP669-711/Ab42 ratio: $r = -0.601$<br>• Plasma composite biomarker: $r = -0.660$                                                                                                                                                                    |
| IP-MS (LC-MS/MS) (Schindler et al., 2019)                         | Plasma A $\beta$ 40, A $\beta$ 42                                                                                                                                      | 158 participants                                                                                                                                                                                             |                                                                                                                                                                                                                                                                           | • Plasma A $\beta$ 42/A $\beta$ 40 ratio: 0.85                                                                                                                                                                                                                                 | CSF A $\beta$ 42/A $\beta$ 40 ratio and plasma A $\beta$ 42/A $\beta$ 40 ratio: $r = 0.66$ (95% CI: 0.56, 0.75)                                                                                                                                                                                                                                                                       |
| Simoa (Janellidze et al., 2016)                                   | Plasma A $\beta$ 40, A $\beta$ 42<br>Measured using "first-generation" singleplex from Quanterix                                                                       | 719 participants:<br>• 174 SCD, 214 MCI, 57 AD, 274 CU<br>• 74 A $\beta$ + CU<br>• 200 A $\beta$ - CU<br>• 60 A $\beta$ + Subjective cognitive decline (SCD)<br>• 121 A $\beta$ + MCI<br>• 53 A $\beta$ + AD | • Plasma A $\beta$ 42: $\downarrow$ in A $\beta$ + CU, A $\beta$ + SCD, A $\beta$ + MCI, A $\beta$ + AD vs A $\beta$ - CU<br>• Plasma A $\beta$ 42/A $\beta$ 40 ratio: $\downarrow$ in A $\beta$ + CU, A $\beta$ + SCD, A $\beta$ + MCI, A $\beta$ + AD vs A $\beta$ - CU | • Plasma A $\beta$ 42, age and gender: 0.655<br>• Plasma A $\beta$ 42/A $\beta$ 40 ratio, age and gender: 0.683                                                                                                                                                                | • CSF A $\beta$ 42 and plasma A $\beta$ 42 in:<br>• All subjects: $r = 0.274$<br>• CU: $r = 0.188$<br>• SCD: $r = 0.182$<br>• MCI: $r = 0.270$<br>• AD: $r = 0.288$<br><br>• CSF A $\beta$ 42/A $\beta$ 40 ratio and plasma A $\beta$ 42/A $\beta$ 40 ratio in:<br>• All subjects: $r = 0.215$<br>• CU: $r = 0.166$<br>• SCD: $r = 0.160$<br>• MCI: $r = 0.202$<br>• AD: $r = -0.003$ |
| Simoa (Verberk et al., 2018)                                      | Plasma A $\beta$ 40, A $\beta$ 42<br>Measured using Neurology 3-plex from Quanterix                                                                                    | 248 participants:<br>• 57 A $\beta$ + and 191 A $\beta$ -                                                                                                                                                    | • Plasma A $\beta$ 42: $\downarrow$ in A $\beta$ + group<br>• Plasma A $\beta$ 42/A $\beta$ 40 ratio: $\downarrow$ in A $\beta$ + group                                                                                                                                   | • Plasma A $\beta$ 42: 0.66<br>• Plasma A $\beta$ 42/A $\beta$ 40 ratio: 0.77<br>• Plasma A $\beta$ 42/A $\beta$ 40 ratio, age and APOE: 0.83                                                                                                                                  | • CSF A $\beta$ 42 and plasma A $\beta$ 42: $r = 0.18$<br>• CSF A $\beta$ 42 and plasma A $\beta$ 42/A $\beta$ 40 ratio: $r = 0.38$                                                                                                                                                                                                                                                   |
| Simoa (Startin et al., 2019)                                      | Plasma A $\beta$ 40, A $\beta$ 42                                                                                                                                      | 54 participants:<br>• 27 controls and 27 A $\beta$ + AD (and 31 Down syndrome)                                                                                                                               | • Plasma A $\beta$ 42: No significant difference between A $\beta$ + AD and controls<br>• Plasma A $\beta$ 42/A $\beta$ 40 ratio: $\downarrow$ in A $\beta$ + AD vs controls                                                                                              |                                                                                                                                                                                                                                                                                |                                                                                                                                                                                                                                                                                                                                                                                       |
| Simoa (Thijssen et al., 2018)                                     | Plasma A $\beta$ 40, A $\beta$ 42<br>Measured using prototype or commercially available Quanterix assay                                                                | 40 participants:<br>• 20 A $\beta$ - SCD and 20 A $\beta$ + AD                                                                                                                                               |                                                                                                                                                                                                                                                                           | • Prototype assay plasma A $\beta$ 42/A $\beta$ 40 ratio: 0.953<br>• Commercial assay plasma A $\beta$ 42/A $\beta$ 40 ratio: 0.852                                                                                                                                            | CSF A $\beta$ 42 and plasma A $\beta$ 42/A $\beta$ 40 ratio in:<br>• Prototype assay: $r = 0.711$<br>• Commercial assay: $r = 0.527$                                                                                                                                                                                                                                                  |
| Simoa and ELISA (De Meyer et al., 2020)                           | Plasma A $\beta$ 40, A $\beta$ 42<br>Measured using prototype Simoa Amyblood assay or ELISA (EUROIMMUN)<br><br>Plasma total-tau (t-tau) was also measured using ELISA. | 199 participants:<br>• 161 A $\beta$ - and 38 A $\beta$ +<br>• 161 CU: 137 A $\beta$ - and 24 A $\beta$ + (Flutemetamol)<br>• 38 aMCI: 24 A $\beta$ - and 14 A $\beta$ + (Florbetaben)                       |                                                                                                                                                                                                                                                                           |                                                                                                                                                                                                                                                                                | • CSF A $\beta$ 42/t-tau and plasma A $\beta$ 42/A $\beta$ 40 ratio:<br>• All:<br>Simoa: $r = 0.29$ vs ELISA: $r = 0.41$<br>• CU:<br>Simoa: $r = 0.25$ vs ELISA: $r = 0.34$<br>• aMCI:<br>Simoa: $r = 0.51$ vs ELISA: $r = 0.80$                                                                                                                                                      |

|                                                        |                                                                                                                               |                                                                                                                                                                                                                                                                                                                                                                                                                                                                                                  |                                                                                                                                                                                                                                                                                                                                                                                                                       |                                                                                                                                                                                                                                                                                                                                                                                                                                                                                                                                                                                                                                                                                                                                                                                                                                                                                                                                                                |                                                                                                                                                                                                                                                                                                                                                                                                                                                                                                                                                                                                                                                                                    |
|--------------------------------------------------------|-------------------------------------------------------------------------------------------------------------------------------|--------------------------------------------------------------------------------------------------------------------------------------------------------------------------------------------------------------------------------------------------------------------------------------------------------------------------------------------------------------------------------------------------------------------------------------------------------------------------------------------------|-----------------------------------------------------------------------------------------------------------------------------------------------------------------------------------------------------------------------------------------------------------------------------------------------------------------------------------------------------------------------------------------------------------------------|----------------------------------------------------------------------------------------------------------------------------------------------------------------------------------------------------------------------------------------------------------------------------------------------------------------------------------------------------------------------------------------------------------------------------------------------------------------------------------------------------------------------------------------------------------------------------------------------------------------------------------------------------------------------------------------------------------------------------------------------------------------------------------------------------------------------------------------------------------------------------------------------------------------------------------------------------------------|------------------------------------------------------------------------------------------------------------------------------------------------------------------------------------------------------------------------------------------------------------------------------------------------------------------------------------------------------------------------------------------------------------------------------------------------------------------------------------------------------------------------------------------------------------------------------------------------------------------------------------------------------------------------------------|
|                                                        |                                                                                                                               |                                                                                                                                                                                                                                                                                                                                                                                                                                                                                                  |                                                                                                                                                                                                                                                                                                                                                                                                                       |                                                                                                                                                                                                                                                                                                                                                                                                                                                                                                                                                                                                                                                                                                                                                                                                                                                                                                                                                                | <ul style="list-style-type: none"> <li>CSF A<math>\beta</math>42/t-tau and plasma A<math>\beta</math>42/t-tau ratio: <ul style="list-style-type: none"> <li>&gt; All: Simoa: <math>r = 0.41</math> vs ELISA: <math>r = 0.50</math></li> <li>&gt; CU: Simoa: <math>r = 0.41</math> vs ELISA: <math>r = 0.50</math></li> <li>&gt; aMCI: Simoa: <math>r = 0.61</math> vs ELISA: <math>r = 0.68</math></li> </ul> </li> </ul>                                                                                                                                                                                                                                                          |
| <b>MDS</b><br>(Wang et al., 2017)                      | Plasma oligomeric A $\beta$<br><br>Measured in MDS relative light unit (RLU)<br>→ higher MDS RLU = higher A $\beta$ oligomers | 50 participants                                                                                                                                                                                                                                                                                                                                                                                                                                                                                  |                                                                                                                                                                                                                                                                                                                                                                                                                       |                                                                                                                                                                                                                                                                                                                                                                                                                                                                                                                                                                                                                                                                                                                                                                                                                                                                                                                                                                | <ul style="list-style-type: none"> <li>CSF A<math>\beta</math>42 and MDS RLU: <math>r = -0.443</math> (<math>p</math>-value not reported)</li> </ul>                                                                                                                                                                                                                                                                                                                                                                                                                                                                                                                               |
| <b>MSD</b><br>(Vogelgsang et al., 2018)                | Plasma A $\beta$ 38, A $\beta$ 40, A $\beta$ 42                                                                               | 41 participants: <ul style="list-style-type: none"> <li>Of the 41 participants, 33 subjects have CSF analysis</li> </ul>                                                                                                                                                                                                                                                                                                                                                                         |                                                                                                                                                                                                                                                                                                                                                                                                                       |                                                                                                                                                                                                                                                                                                                                                                                                                                                                                                                                                                                                                                                                                                                                                                                                                                                                                                                                                                | <ul style="list-style-type: none"> <li>CSF A<math>\beta</math>42 and plasma A<math>\beta</math>42: <math>r = 0.017</math></li> <li>CSF A<math>\beta</math>42/A<math>\beta</math>40 ratio and plasma A<math>\beta</math>42/A<math>\beta</math>40 ratio: <math>r = 0.425</math></li> </ul>                                                                                                                                                                                                                                                                                                                                                                                           |
| <b>IMR</b><br>(Teunissen et al., 2018)                 | Plasma A $\beta$ 42                                                                                                           | <ul style="list-style-type: none"> <li>Cohort 1 (n=51) <ul style="list-style-type: none"> <li>33 A<math>\beta</math>+ AD and 18 A<math>\beta</math>- CU (controls)</li> </ul> </li> <li>Cohort 2 (n=55): <ul style="list-style-type: none"> <li>30 AD and 25 SCD (controls)</li> </ul> </li> </ul>                                                                                                                                                                                               | Combining subjects of the 2 sites: <ul style="list-style-type: none"> <li>Plasma A<math>\beta</math>42: ↑ in AD vs controls</li> </ul>                                                                                                                                                                                                                                                                                |                                                                                                                                                                                                                                                                                                                                                                                                                                                                                                                                                                                                                                                                                                                                                                                                                                                                                                                                                                | <ul style="list-style-type: none"> <li>CSF A<math>\beta</math>42 and plasma A<math>\beta</math>42: <ul style="list-style-type: none"> <li>Controls: <math>r = 0.186</math></li> <li>AD: <math>r = -0.352</math></li> </ul> </li> </ul> <p>(<math>p</math>-value not reported)</p>                                                                                                                                                                                                                                                                                                                                                                                                  |
| <b>Elecsys immunoassay</b><br>(Palmqvist et al., 2019) | Plasma A $\beta$ 40, A $\beta$ 42                                                                                             | <ul style="list-style-type: none"> <li>Cohort 1 (n=842): <ul style="list-style-type: none"> <li>368 A<math>\beta</math>+ and 474 A<math>\beta</math>-</li> <li>513 CU: 147 A<math>\beta</math>+, 366 A<math>\beta</math>-</li> <li>265 MCI: 157 A<math>\beta</math>+, 108 A<math>\beta</math>-</li> <li>64 AD: all A<math>\beta</math>+</li> </ul> </li> <li>Cohort 2 (n=237): <ul style="list-style-type: none"> <li>34 CU</li> <li>109 MCI</li> <li>94 AD mild dementia</li> </ul> </li> </ul> | Cohort 1: <ul style="list-style-type: none"> <li>Plasma A<math>\beta</math>42 or A<math>\beta</math>42/A<math>\beta</math>40 ratio: ↓ in A<math>\beta</math>+ group</li> <li>Plasma A<math>\beta</math>42 or A<math>\beta</math>42/A<math>\beta</math>40 ratio: ↓ in A<math>\beta</math>+ CU, A<math>\beta</math>+ MCI and A<math>\beta</math>+ AD vs A<math>\beta</math>- CU and A<math>\beta</math>- MCI</li> </ul> | <ul style="list-style-type: none"> <li>Cohort 1: <ul style="list-style-type: none"> <li>Plasma A<math>\beta</math>42 in: <ul style="list-style-type: none"> <li>All subjects: 0.71</li> <li>CU: 0.71</li> <li>MCI+AD: 0.72</li> </ul> </li> <li>Plasma A<math>\beta</math>42/A<math>\beta</math>40 ratio in: <ul style="list-style-type: none"> <li>All subjects: 0.77</li> <li>CU: 0.78</li> <li>MCI+AD: 0.75</li> </ul> </li> <li>Plasma A<math>\beta</math>42 and A<math>\beta</math>40 in: <ul style="list-style-type: none"> <li>All subjects: 0.80</li> <li>CU: 0.78</li> <li>MCI+AD: 0.80</li> </ul> </li> <li>Plasma A<math>\beta</math>42, A<math>\beta</math>40 and APOE in: <ul style="list-style-type: none"> <li>All subjects: 0.85</li> <li>CU: 0.84</li> <li>MCI+AD: 0.84</li> </ul> </li> </ul> </li> <li>Cohort 2: <ul style="list-style-type: none"> <li>Plasma A<math>\beta</math>42 and A<math>\beta</math>40: 0.86</li> </ul> </li> </ul> | <ul style="list-style-type: none"> <li>Cohort 1: <ul style="list-style-type: none"> <li>CSF A<math>\beta</math>42 and plasma A<math>\beta</math>42 in: <ul style="list-style-type: none"> <li>All subjects: <math>r = 0.373</math></li> <li>CU: <math>r = 0.284</math></li> <li>MCI: <math>r = 0.368</math></li> <li>AD: <math>r = 0.395</math></li> </ul> </li> <li>CSF A<math>\beta</math>42/40 ratio and plasma A<math>\beta</math>42/40 ratio in: <ul style="list-style-type: none"> <li>All subjects: <math>r = 0.476</math></li> <li>CU: <math>r = 0.452</math></li> <li>MCI: <math>r = 0.410</math></li> <li>AD: <math>r = -0.047</math></li> </ul> </li> </ul> </li> </ul> |

All studies used PiB-PET for amyloid imaging unless stated otherwise.

Significant correlation coefficients ( $p < 0.05$ ) are in red font.

## References

- De Meyer, S., Schaeveerbeke, J. M., Verberk, I. M. W., Gille, B., De Schaepdryver, M., Luckett, E. S., . . . Poesen, K. (2020). Comparison of ELISA- and SIMOA-based quantification of plasma A $\beta$  ratios for early detection of cerebral amyloidosis. *Alzheimer's Research & Therapy*, *12*(1), 162. doi:10.1186/s13195-020-00728-w
- Janelidze, S., Stomrud, E., Palmqvist, S., Zetterberg, H., van Westen, D., Jeromin, A., . . . Hansson, O. (2016). Plasma  $\beta$ -amyloid in Alzheimer's disease and vascular disease. *Scientific Reports*, *6*, 26801. doi:10.1038/srep26801  
<https://www.nature.com/articles/srep26801#supplementary-information>
- Kaneko, N., Nakamura, A., Washimi, Y., Kato, T., Sakurai, T., Arahata, Y., . . . Yanagisawa, K. (2014). Novel plasma biomarker surrogating cerebral amyloid deposition. *Proc Jpn Acad Ser B Phys Biol Sci*, *90*(9), 353-364.
- Keshavan, A., Pannee, J., Karikari, T. K., Rodriguez, J. L., Ashton, N. J., Nicholas, J. M., . . . Schott, J. M. (2021). Population-based blood screening for preclinical Alzheimer's disease in a British birth cohort at age 70. *Brain*, *144*(2), 434-449. doi:10.1093/brain/awaa403 %J Brain
- Kim, Y., Yoo, Y. K., Kim, H. Y., Roh, J. H., Kim, J., Baek, S., . . . Hwang, K. S. (2019). Comparative analyses of plasma amyloid-beta levels in heterogeneous and monomerized states by interdigitated microelectrode sensor system. *Sci Adv*, *5*(4), eaav1388. doi:10.1126/sciadv.aav1388
- Lim, C. Z. J., Zhang, Y., Chen, Y., Zhao, H., Stephenson, M. C., Ho, N. R. Y., . . . Shao, H. (2019). Subtyping of circulating exosome-bound amyloid  $\beta$  reflects brain plaque deposition. *Nature Communications*, *10*(1), 1144. doi:10.1038/s41467-019-09030-2
- Nakamura, A., Kaneko, N., Vilmagne, V. L., Kato, T., Doecke, J., Doré, V., . . . Yanagisawa, K. (2018). High performance plasma amyloid- $\beta$  biomarkers for Alzheimer's disease. *Nature*, *554*, 249. doi:10.1038/nature25456  
<https://www.nature.com/articles/nature25456#supplementary-information>
- Ovod, V., Ramsey, K. N., Mawuenyega, K. G., Bollinger, J. G., Hicks, T., Schneider, T., . . . Bateman, R. J. (2017). Amyloid  $\beta$  concentrations and stable isotope labeling kinetics of human plasma specific to central nervous system amyloidosis. *Alzheimers Dement*, *13*(8), 841-849. doi:10.1016/j.jalz.2017.06.2266
- Palmqvist, S., Janelidze, S., Stomrud, E., Zetterberg, H., Karl, J., Zink, K., . . . Hansson, O. (2019). Performance of Fully Automated Plasma Assays as Screening Tests for Alzheimer Disease-Related  $\beta$ -Amyloid Status. *JAMA Neurology*, e191632. doi:10.1001/jamaneuro.2019.1632
- Panee, J., Törnqvist, U., Westerlund, A., Ingelsson, M., Lannfelt, L., Brinkmalm, G., . . . Portelius, E. (2014). The amyloid- $\beta$  degradation pattern in plasma—a possible tool for clinical trials in Alzheimer's disease. *Neurosci Lett*, *573*, 7-12. doi:10.1016/j.neulet.2014.04.041
- Schindler, S. E., Bollinger, J. G., Ovod, V., Mawuenyega, K. G., Li, Y., Gordon, B. A., . . . Bateman, R. J. (2019). High-precision plasma  $\beta$ -amyloid 42/40 predicts current and future brain amyloidosis. *Neurology*, *93*(17), e1647-e1659. doi:10.1212/WNL.0000000000008081 %J Neurology
- Startin, C. M., Ashton, N. J., Hamburg, S., Hithersay, R., Wiseman, F. K., Mok, K. Y., . . . Strydom, A. (2019). Plasma biomarkers for amyloid, tau, and cytokines in Down syndrome and sporadic Alzheimer's disease. *Alzheimers Res Ther*, *11*(1), 26. doi:10.1186/s13195-019-0477-0
- Tanaka, T., Ruifen, J. C., Nai, Y. H., Tan, C. H., Lim, C. Z. J., Zhang, Y., . . . Chen, C. (2020). Head-to-head comparison of amplified plasmonic exosome A $\beta$ 42 platform and single-molecule array immunoassay in a memory clinic cohort. *Eur J Neurol*. doi:10.1111/ene.14704
- Teunissen, C. E., Chiu, M. J., Yang, C. C., Yang, S. Y., Scheltens, P., Zetterberg, H., & Blennow, K. (2018). Plasma Amyloid-beta (A $\beta$ 42) Correlates with Cerebrospinal Fluid A $\beta$ 42 in Alzheimer's Disease. *J Alzheimers Dis*, *62*(4), 1857-1863. doi:10.3233/jad-170784
- Thijssen, E., Verberk, I. M. W., Vanderstichele, H. M., Heijst, H., Scheltens, P., Stoops, E., & Teunissen, C. E. (2018). A PROTOTYPE SIMOA ASSAY QUANTIFYING PLASMA AMYLOID BETA 1-42 AND 1-40 ISOFORMS CAN DIFFERENTIATE PARTICIPANTS WITH AD FROM HEALTHY CONTROL SUBJECTS. *Alzheimer's & Dementia: The Journal of the Alzheimer's Association*, *14*(7), P1039. doi:10.1016/j.jalz.2018.06.2824
- Tzen, K.-Y., Yang, S.-Y., Chen, T.-F., Cheng, T.-W., Horng, H.-E., Wen, H.-P., . . . Chiu, M.-J. (2014). Plasma A $\beta$  but Not Tau is Related to Brain PiB Retention in Early Alzheimer's Disease. *ACS Chemical Neuroscience*, *5*(9), 830-836. doi:10.1021/cn500101j
- Verberk, I. M. W., Slot, R. E., Verfaillie, S. C. J., Heijst, H., Prins, N. D., van Berckel, B. N. M., . . . van der Flier, W. M. (2018). Plasma Amyloid as Prescreener for the Earliest Alzheimer Pathological Changes. *Ann Neurol*, *84*(5), 648-658. doi:10.1002/ana.25334
- Vogelgsang, J., Shahpasand-Kroner, H., Vogelgsang, R., Streit, F., Vukovich, R., & Wiltfang, J. (2018). Multiplex immunoassay measurement of amyloid-beta42 to amyloid-beta40 ratio in plasma discriminates between dementia due to Alzheimer's disease and dementia not due to Alzheimer's disease. *Exp Brain Res*, *236*(5), 1241-1250. doi:10.1007/s00221-018-5210-x
- Wang, M. J., Yi, S., Han, J.-y., Park, S. Y., Jang, J.-W., Chun, I. K., . . . Kim, S. (2017). Oligomeric forms of amyloid- $\beta$  protein in plasma as a potential blood-based biomarker for Alzheimer's disease. *Alzheimer's Research & Therapy*, *9*(1), 98. doi:10.1186/s13195-017-0324-0
